# Supplementary material
Source: PubMed Central journal article supplement (PMC3173196)
Supplement: supp_M111.271247_jbc.M111.271247-1.pdf [file supp_M111.271247_jbc.M111.271247-1.pdf]

SUPPLEMENTAL DATA

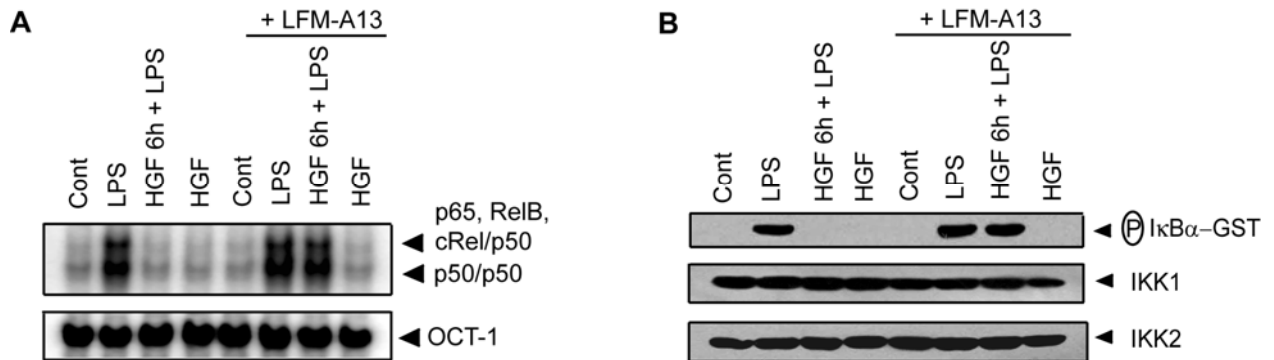

FIGURE S1. **Btk activation is essential for HGF-induced inhibition of NF- $\kappa$ B signaling in B6 BMDCs.** B6 BMDCs were pretreated or not with LFM-A13 and incubated with HGF for 6 h. BMDCs were then stimulated with LPS for 30 min. *A*, Nuclear NF- $\kappa$ B or OCT-1 DNA binding activity was determined via EMSA. *B*, In vitro IKK activity and expression of IKK1 and IKK2 were determined as described in Fig. 3 legend. Data are the representative of 2 independent experiments.

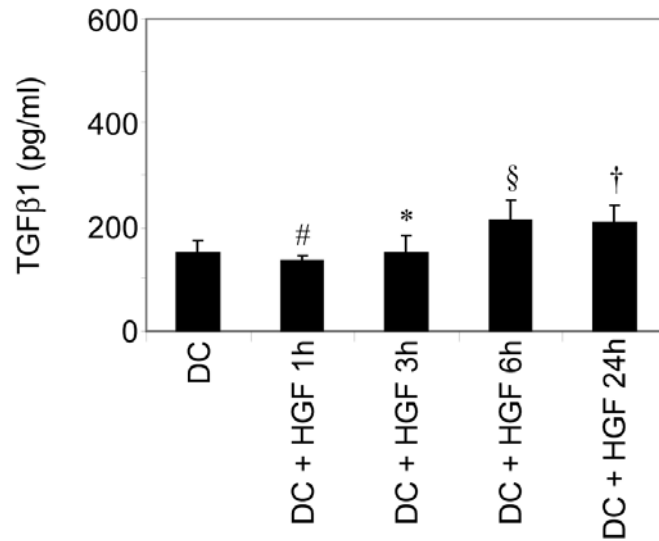

**FIGURE S2. Secretion of TGFβ1 is not induced by HGF treatment of BMDCs.** BMDCs were treated with HGF for specified times. TGFβ1 secretion was measured via ELISA. Data are the representative of 3 independent experiments and were analyzed using one-way ANOVA. # $p = 0.4$  DC treated with HGF for 1 h versus DC; \* $p = 0.981$  DC treated with HGF for 3 h versus DC; § $p = 0.081$  DC treated with HGF for 6 h versus DC; and † $p = 0.073$  DC treated with HGF for 24 h versus DC. Findings were considered significant with “ $p$ ” values  $\leq 0.05$ .
